# Supplementary material
Source: PubMed Central journal article supplement (PMC9013729)
Supplement: NIHMS1749801-supplement-1.pdf [file NIHMS1749801-supplement-1.pdf]

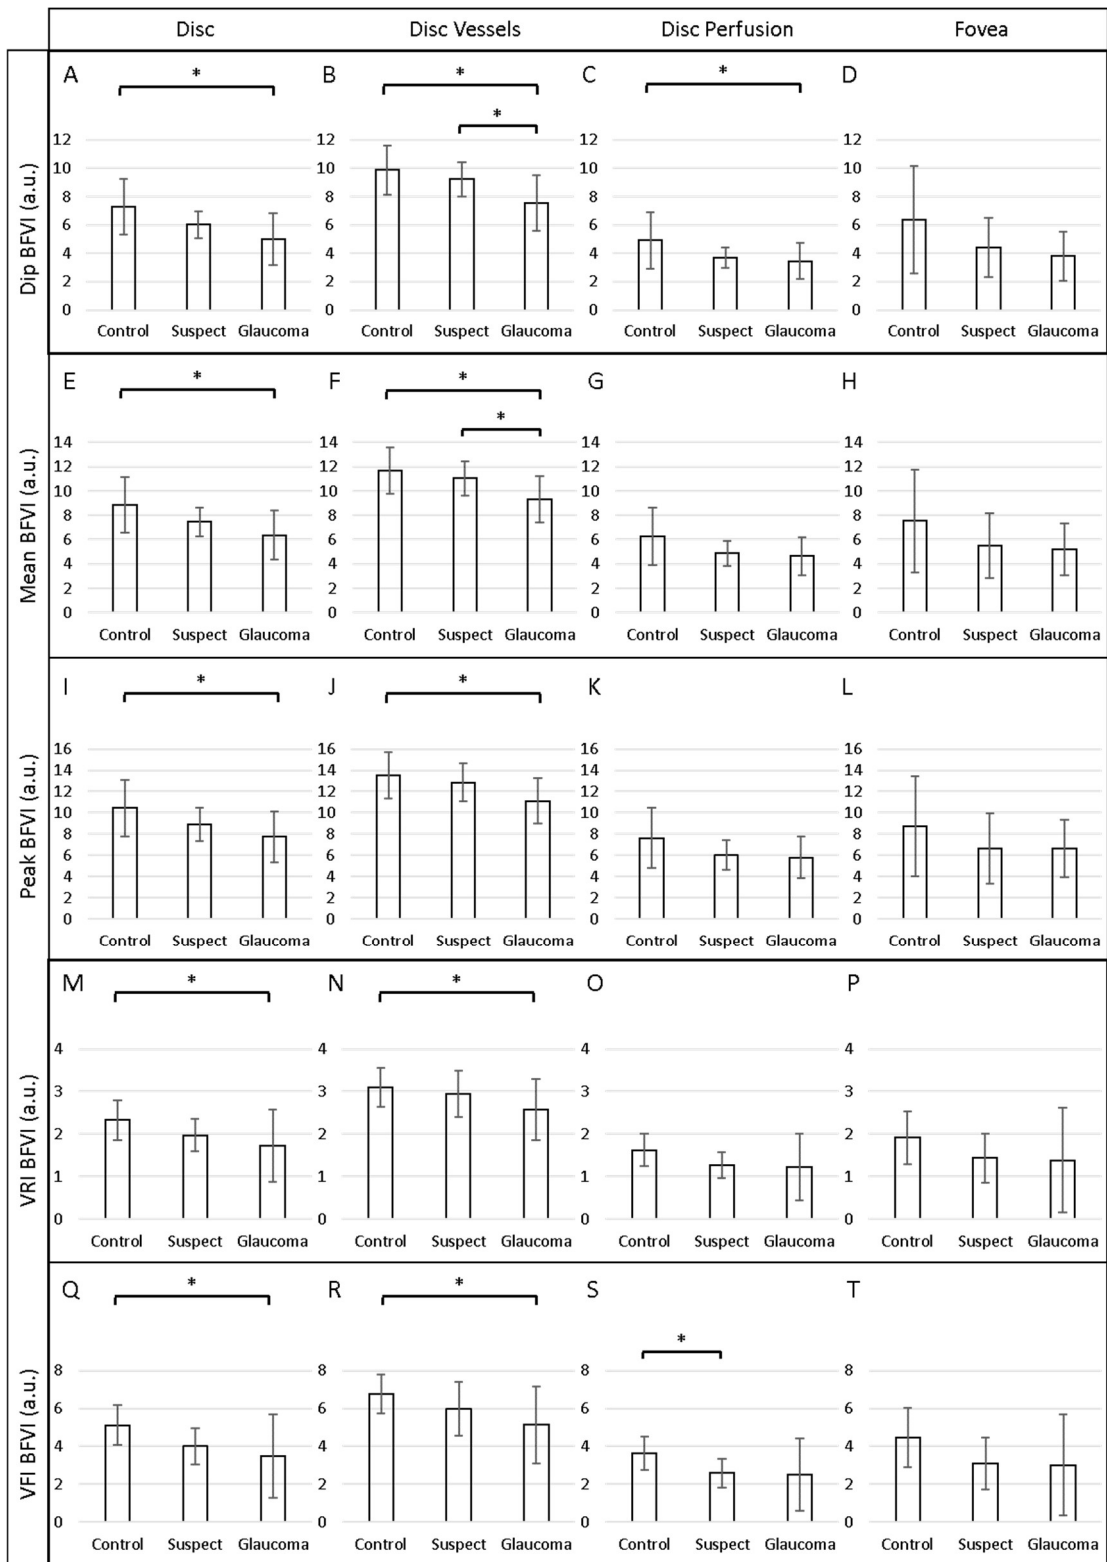

**Supplemental Figure S1:** Average  $\pm$  Standard Deviation blood flow velocity index (BFVi) measurements at dip (A, B, C, D), mean (E, F, G, H), peak (I, J, K, L), volumetric rise index (VRI) (M, N, O, P), and volumetric fall index (VFI) (Q, R, S, T) at the optic disc (A, E, I, M, Q), disc vessels (B, F, J, N, R), disc perfusion (C, G, K, O, S), and fovea (D, H, L, P, T). Asterisks indicate significantly different pairwise results of Tukey-Kramer tests ( $*p < 0.05$ ).
