# Supplementary material
Source: PubMed Central journal article supplement (PMC9013729)
Supplement: NIHMS1749801-supplement-2.pdf [file NIHMS1749801-supplement-2.pdf]

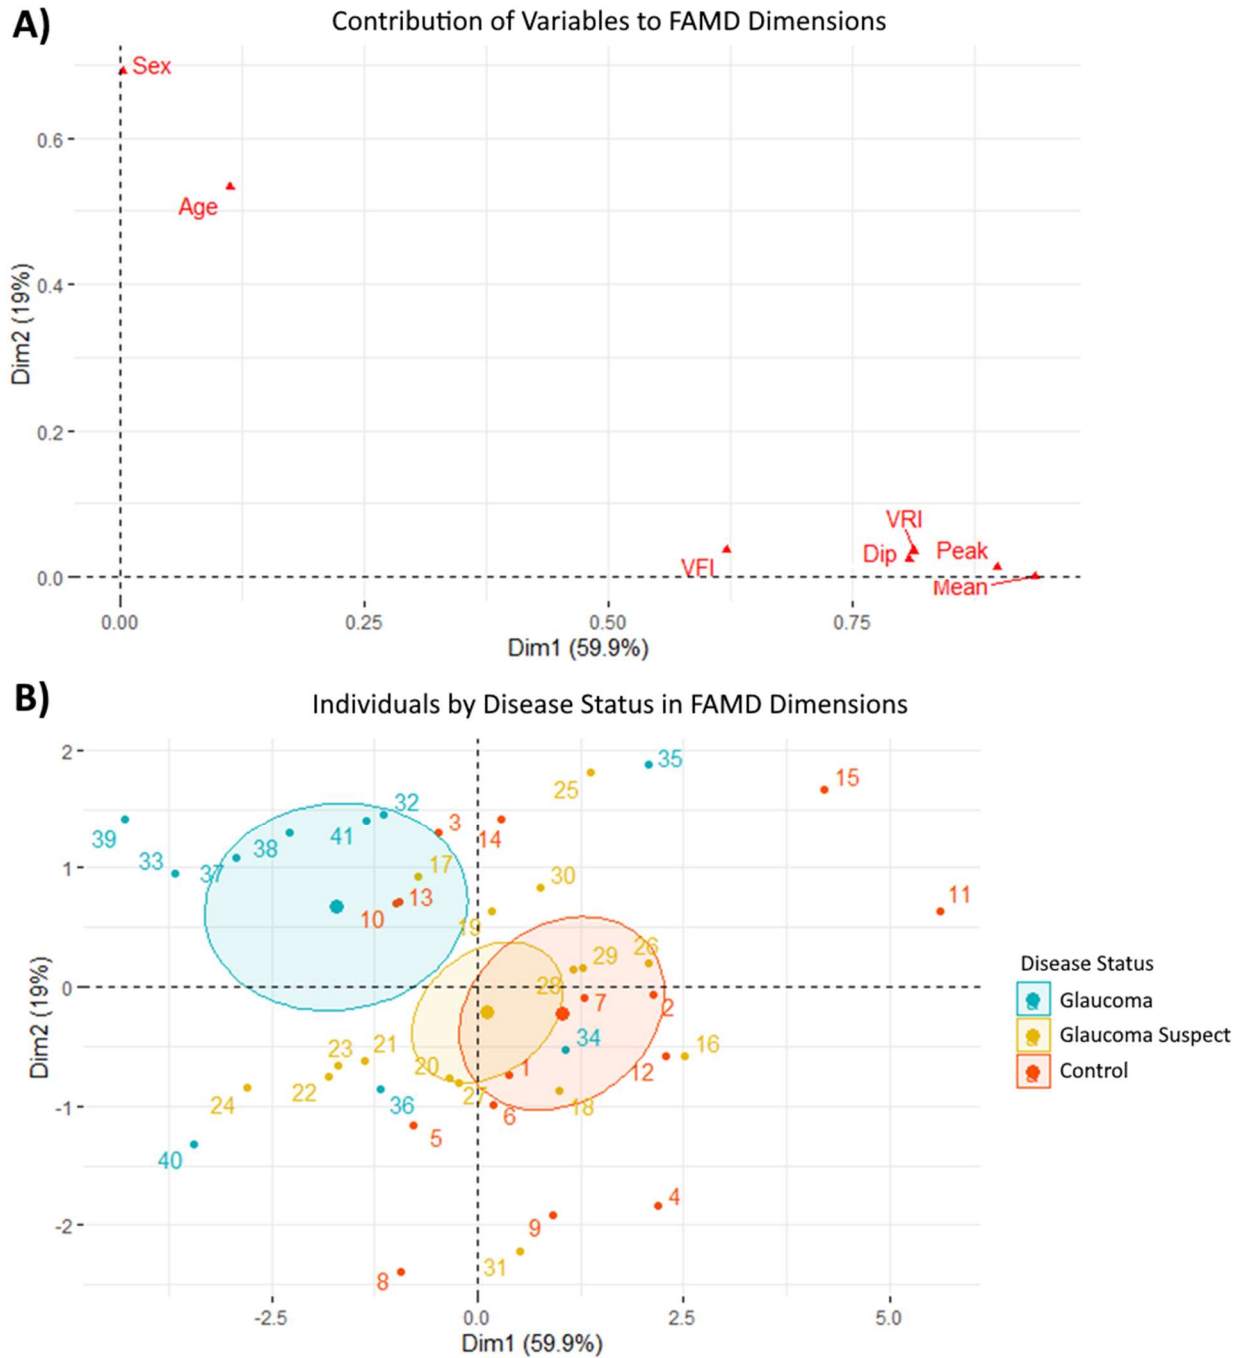

**Supplemental Figure S2:** Results for the Factorial Analysis of Mixed Data (FAMD). A) The contribution of the velocity falling index (VFI), velocity rising index (VRI), dip, peak, mean, sex and age variables to the FAMD orthogonal dimensions (Dim1 and Dim2). B) Each individual subject with disease status labels indicating glaucoma (blue), glaucoma suspect (yellow) and control (red) plotted along standardized FAMD dimensions.
