# Supplementary material
Source: PubMed Central journal article supplement (PMC9013729)
Supplement: NIHMS1749801-supplement-3.pdf [file NIHMS1749801-supplement-3.pdf]

|                         | <b>Screened but not imaged</b> | <b>Imaged</b> |
|-------------------------|--------------------------------|---------------|
| <b>Age</b>              | 55.5 +/- 15.7                  | 56.1 +/- 15.3 |
| <b>Race</b>             |                                |               |
| <b>Black</b>            | 24 (51%)                       | 21 (46%)      |
| <b>Non-Black</b>        | 23 (49%)                       | 25 (54%)      |
| <b>Sex</b>              |                                |               |
| <b>Male</b>             | 21 (45%)                       | 20 (43%)      |
| <b>Female</b>           | 26 (55%)                       | 26 (57%)      |
| <b>Diagnosis</b>        |                                |               |
| <b>Healthy Controls</b> | 24 (51%)                       | 20 (43%)      |
| <b>Glaucoma Suspect</b> | 13 (28%)                       | 16 (35%)      |
| <b>Glaucoma</b>         | 10 (21%)                       | 10 (22%)      |

**Supplemental Table S1:** Demographics of screened and imaged subjects
