# Supplementary material
Source: PubMed Central journal article supplement (PMC9013729)
Supplement: NIHMS1749801-supplement-4.pdf [file NIHMS1749801-supplement-4.pdf]

| Region of Interest | BFVi Metrics | Age    | IOP   | CDR    | OCT - MRW | OCT - RNFL | VF - MD | VF - PSD |
|--------------------|--------------|--------|-------|--------|-----------|------------|---------|----------|
| Optic Disc         | Dip (au)     | -0.15  | -0.14 | -0.75* | 0.47      | -0.34      |         |          |
|                    | Mean (au)    | -0.07  | -0.09 | -0.73* | 0.40      | -0.46      |         |          |
|                    | Peak (au)    | 0.00   | -0.05 | -0.69* | 0.31      | -0.53      |         |          |
|                    | VRI (au)     | 0.10   | 0.09  | -0.60  | -0.23     | -0.54      |         |          |
|                    | VFI (au)     | -0.07  | 0.37  | -0.34  | -0.40     | -0.52      |         |          |
|                    | TtR (ms)     | 0.41   | 0.20  | 0.03   | -0.54     | -0.20      |         |          |
|                    | TtF (ms)     | 0.00   | 0.46  | 0.30   | -0.55     | -0.23      |         |          |
|                    | Skew         | 0.84*  | -0.01 | -0.08  | -0.26     | -0.21      |         |          |
|                    | ATI          | 0.32   | -0.42 | -0.21  | 0.17      | 0.16       |         |          |
|                    | BOT          | -0.83* | 0.09  | 0.20   | 0.16      | 0.21       |         |          |
| Disc Vessels       | Dip (au)     | -0.19  | -0.26 | -0.81* | 0.53      | -0.16      |         |          |
|                    | Mean (au)    | -0.09  | -0.21 | -0.89* | 0.43      | -0.33      |         |          |
|                    | Peak (au)    | 0.00   | -0.15 | -0.85* | 0.32      | -0.45      |         |          |
|                    | VRI (au)     | 0.18   | 0.05  | -0.60  | -0.31     | -0.46      |         |          |
|                    | VFI (au)     | -0.09  | 0.44  | -0.22  | -0.47     | -0.46      |         |          |
|                    | TtR (ms)     | 0.41   | 0.20  | 0.03   | -0.54     | -0.20      |         |          |
|                    | TtF (ms)     | 0.00   | 0.46  | 0.30   | -0.55     | -0.23      |         |          |
|                    | Skew         | 0.85*  | -0.07 | -0.25  | -0.11     | -0.17      |         |          |
|                    | ATI          | 0.32   | -0.42 | -0.21  | 0.17      | 0.16       |         |          |
|                    | BOT          | -0.81* | 0.22  | 0.44   | -0.12     | 0.14       |         |          |
| Disc Perfusion     | Dip (au)     | -0.06  | -0.20 | -0.68* | 0.41      | -0.49      |         |          |
|                    | Mean (au)    | 0.00   | -0.15 | -0.66  | 0.35      | -0.57      |         |          |
|                    | Peak (au)    | 0.04   | -0.10 | -0.63  | 0.27      | -0.62*     |         |          |
|                    | VRI (au)     | 0.09   | 0.00  | -0.58  | -0.14     | -0.62*     |         |          |
|                    | VFI (au)     | -0.02  | 0.24  | -0.38  | -0.26     | -0.58      |         |          |
|                    | TtR (ms)     | 0.41   | 0.20  | 0.03   | -0.54     | -0.20      |         |          |
|                    | TtF (ms)     | 0.00   | 0.46  | 0.30   | -0.55     | -0.23      |         |          |
|                    | Skew         | 0.76*  | 0.02  | 0.01   | -0.33     | -0.21      |         |          |
|                    | ATI          | 0.32   | -0.42 | -0.21  | 0.17      | 0.16       |         |          |
|                    | BOT          | -0.75* | 0.00  | 0.11   | 0.25      | 0.20       |         |          |
| Fovea              | Dip (au)     | -0.34  | -0.29 | -0.36  | 0.29      | -0.22      |         |          |
|                    | Mean (au)    | -0.29  | -0.29 | -0.38  | 0.29      | -0.24      |         |          |
|                    | Peak (au)    | -0.24  | -0.30 | -0.41  | 0.29      | -0.25      |         |          |
|                    | VRI (au)     | -0.23  | -0.29 | -0.35  | 0.14      | -0.40      |         |          |
|                    | VFI (au)     | -0.32  | -0.26 | -0.21  | 0.16      | -0.45      |         |          |
|                    | TtR (ms)     | 0.38   | 0.07  | 0.07   | -0.52     | -0.38      |         |          |
|                    | TtF (ms)     | 0.06   | 0.00  | 0.34   | -0.33     | -0.38      |         |          |
|                    | Skew         | 0.78*  | 0.30  | -0.02  | -0.16     | 0.08       |         |          |
|                    | ATI          | 0.23   | 0.06  | -0.24  | -0.01     | 0.28       |         |          |
|                    | BOT          | -0.76* | -0.28 | 0.06   | 0.08      | -0.22      |         |          |

**Supplemental Table 2A: Comparison between ocular blood flow metrics and traditional metrics used in glaucoma management among control subjects.** Pearson correlation coefficients (R) between BFVi measurements at dip, cycle mean, and peak in specific regions of the eye and conventional risk factors and indicators of glaucoma – age, intraocular pressure (IOP) in mmHg, cup to disc ratio (CDR), OCT metrics: minimum rim width (MRW) and retinal nerve fiber layer (RNFL), and visual field metrics: mean deviation (MD) and pattern standard deviation (PSD). Asterisks (\*) indicate significant correlations ( $p < 0.05$ ).

VRI: volumetric rise index, VFI: volumetric fall index, TtR: time-to-rise, TtF: time-to-fall, ATI: acceleration time index, BOT: blow-out time, a.u.: arbitrary units, ms: milliseconds

| Region of Interest | BFVi Metrics | Age    | IOP   | CDR    | OCT - MRW | OCT - RNFL | VF - MD | VF - PSD |
|--------------------|--------------|--------|-------|--------|-----------|------------|---------|----------|
| Optic Disc         | Dip (au)     | 0.04   | -0.17 | -0.19  | -0.03     | 0.11       | 0.07    | 0.35     |
|                    | Mean (au)    | 0.17   | -0.07 | -0.28  | -0.13     | -0.21      | 0.04    | 0.23     |
|                    | Peak (au)    | 0.24   | 0.00  | -0.31  | -0.17     | -0.38      | 0.03    | 0.14     |
|                    | VRI (au)     | 0.29   | 0.14  | -0.28  | -0.23     | -0.24      | 0.23    | 0.17     |
|                    | VFI (au)     | 0.00   | 0.28  | -0.31  | -0.15     | -0.27      | 0.19    | 0.12     |
|                    | TtR (ms)     | 0.33   | 0.40  | -0.09  | -0.29     | -0.21      | 0.35    | -0.09    |
|                    | TtF (ms)     | -0.19  | 0.49  | -0.18  | -0.08     | -0.18      | 0.17    | -0.04    |
|                    | Skew         | 0.62*  | 0.12  | -0.48  | 0.09      | -0.16      | -0.37   | 0.30     |
|                    | ATI          | 0.47   | -0.33 | 0.16   | -0.13     | 0.04       | 0.04    | -0.04    |
|                    | BOT          | -0.50* | -0.02 | 0.52*  | -0.16     | 0.25       | 0.58*   | -0.36    |
| Disc Vessels       | Dip (au)     | -0.08  | -0.48 | 0.14   | -0.24     | 0.02       | 0.18    | 0.46     |
|                    | Mean (au)    | 0.05   | -0.37 | 0.03   | -0.34     | -0.33      | 0.15    | 0.34     |
|                    | Peak (au)    | 0.13   | -0.25 | -0.05  | -0.36     | -0.52*     | 0.11    | 0.22     |
|                    | VRI (au)     | 0.24   | -0.09 | -0.04  | -0.45     | -0.38      | 0.36    | 0.25     |
|                    | VFI (au)     | -0.12  | 0.13  | -0.09  | -0.28     | -0.35      | 0.26    | 0.15     |
|                    | TtR (ms)     | 0.33   | 0.40  | -0.09  | -0.29     | -0.21      | 0.35    | -0.09    |
|                    | TtF (ms)     | -0.19  | 0.49  | -0.18  | -0.08     | -0.18      | 0.17    | -0.04    |
|                    | Skew         | 0.62*  | 0.14  | -0.53* | 0.12      | -0.19      | -0.42   | 0.28     |
|                    | ATI          | 0.47   | -0.33 | 0.16   | -0.13     | 0.04       | 0.04    | -0.04    |
|                    | BOT          | -0.45  | 0.02  | 0.58*  | -0.17     | 0.25       | 0.61*   | -0.37    |
| Disc Perfusion     | Dip (au)     | 0.11   | 0.06  | -0.27  | 0.06      | 0.03       | 0.10    | 0.00     |
|                    | Mean (au)    | 0.23   | 0.12  | -0.32  | -0.05     | -0.24      | 0.07    | -0.06    |
|                    | Peak (au)    | 0.28   | 0.14  | -0.34  | -0.10     | -0.37      | 0.05    | -0.08    |
|                    | VRI (au)     | 0.33   | 0.27  | -0.32  | -0.14     | -0.27      | 0.22    | -0.08    |
|                    | VFI (au)     | 0.08   | 0.36  | -0.34  | -0.09     | -0.29      | 0.20    | -0.07    |
|                    | TtR (ms)     | 0.33   | 0.40  | -0.09  | -0.29     | -0.21      | 0.35    | -0.09    |
|                    | TtF (ms)     | -0.19  | 0.49  | -0.18  | -0.08     | -0.18      | 0.17    | -0.04    |
|                    | Skew         | 0.57*  | 0.10  | -0.46  | 0.05      | -0.17      | -0.37   | 0.34     |
|                    | ATI          | 0.47   | -0.33 | 0.16   | -0.13     | 0.04       | 0.04    | -0.04    |
|                    | BOT          | -0.45  | -0.05 | 0.48   | -0.11     | 0.23       | 0.54*   | -0.38    |
| Fovea              | Dip (au)     | -0.11  | 0.04  | 0.16   | -0.09     | -0.28      | 0.27    | -0.32    |
|                    | Mean (au)    | -0.02  | 0.05  | 0.11   | -0.16     | -0.41      | 0.24    | -0.31    |
|                    | Peak (au)    | 0.04   | 0.06  | 0.09   | -0.20     | -0.48      | 0.21    | -0.29    |
|                    | VRI (au)     | 0.04   | 0.14  | 0.05   | -0.16     | -0.39      | 0.29    | -0.30    |
|                    | VFI (au)     | -0.04  | 0.16  | 0.07   | -0.15     | -0.38      | 0.28    | -0.28    |
|                    | TtR (ms)     | 0.21   | 0.52  | -0.32  | 0.00      | 0.11       | 0.31    | -0.05    |
|                    | TtF (ms)     | -0.07  | 0.40  | -0.14  | 0.01      | -0.04      | 0.16    | 0.07     |
|                    | Skew         | 0.81*  | 0.08  | -0.24  | 0.02      | -0.15      | -0.26   | 0.24     |
|                    | ATI          | 0.28   | -0.10 | -0.04  | -0.03     | 0.12       | 0.03    | -0.15    |
|                    | BOT          | -0.71* | -0.05 | 0.28   | -0.05     | 0.22       | 0.43    | -0.30    |

**Supplemental Table 2B: Comparison between ocular blood flow metrics and traditional metrics used in glaucoma management among glaucoma suspect subjects.** Pearson correlation coefficients (R) between BFVi measurements at dip, cycle mean, and peak in specific regions of the eye and conventional risk factors and indicators of glaucoma – age, intraocular pressure (IOP) in mmHg, cup to disc ratio (CDR), OCT metrics: minimum rim width (MRW) and retinal nerve fiber layer (RNFL), and visual field metrics: mean deviation (MD) and pattern standard deviation (PSD). Asterisks (\*) indicate significant correlations (p<0.05).

VRI: volumetric rise index, VFI: volumetric fall index, TtR: time-to-rise, TtF: time-to-fall, ATI: acceleration time index, BOT: blow-out time, a.u: arbitrary units, ms: milliseconds

| Region of Interest | BFVi Metrics | Age    | IOP   | CDR    | OCT - MRW | OCT - RNFL | VF - MD | VF - PSD |
|--------------------|--------------|--------|-------|--------|-----------|------------|---------|----------|
| Optic Disc         | Dip (au)     | -0.32  | 0.19  | -0.64  | 0.80*     | 0.76*      | 0.60    | -0.70*   |
|                    | Mean (au)    | -0.16  | 0.28  | -0.74* | 0.81*     | 0.86*      | 0.47    | -0.71*   |
|                    | Peak (au)    | -0.03  | 0.33  | -0.76* | 0.75*     | 0.88*      | 0.35    | -0.68*   |
|                    | VRI (au)     | -0.19  | 0.36  | -0.62  | 0.60      | 0.72*      | 0.62    | -0.76*   |
|                    | VFI (au)     | -0.03  | 0.42  | -0.55  | 0.42      | 0.62       | 0.45    | -0.69*   |
|                    | TtR (ms)     | -0.03  | 0.12  | 0.47   | -0.46     | -0.38      | 0.15    | 0.02     |
|                    | TtF (ms)     | 0.16   | 0.25  | 0.07   | -0.23     | -0.01      | 0.05    | -0.16    |
|                    | Skew         | 0.69*  | 0.07  | -0.25  | -0.05     | 0.23       | -0.79*  | 0.35     |
|                    | ATI          | -0.32  | -0.33 | 0.15   | 0.05      | -0.22      | 0.16    | 0.26     |
|                    | BOT          | -0.69* | -0.17 | 0.21   | 0.01      | -0.18      | 0.83*   | -0.41    |
| Disc Vessels       | Dip (au)     | -0.40  | 0.25  | -0.32  | 0.64*     | 0.52       | 0.68*   | -0.73*   |
|                    | Mean (au)    | -0.18  | 0.40  | -0.44  | 0.69*     | 0.68*      | 0.49    | -0.74*   |
|                    | Peak (au)    | 0.05   | 0.48  | -0.50  | 0.63*     | 0.73*      | 0.27    | -0.67*   |
|                    | VRI (au)     | -0.23  | 0.48  | -0.12  | 0.33      | 0.34       | 0.58    | -0.64    |
|                    | VFI (au)     | 0.02   | 0.54  | -0.21  | 0.22      | 0.35       | 0.35    | -0.56    |
|                    | TtR (ms)     | -0.03  | 0.12  | 0.47   | -0.46     | -0.38      | 0.15    | 0.02     |
|                    | TtF (ms)     | 0.16   | 0.25  | 0.07   | -0.23     | -0.01      | 0.05    | -0.16    |
|                    | Skew         | 0.50   | 0.17  | -0.28  | -0.04     | 0.26       | -0.85*  | 0.39     |
|                    | ATI          | -0.32  | -0.33 | 0.15   | 0.05      | -0.22      | 0.16    | 0.26     |
|                    | BOT          | -0.40  | -0.36 | 0.21   | -0.02     | -0.20      | 0.82*   | -0.44    |
| Disc Perfusion     | Dip (au)     | -0.27  | 0.17  | -0.61  | 0.75*     | 0.76*      | 0.52    | -0.66    |
|                    | Mean (au)    | -0.09  | 0.25  | -0.70* | 0.73*     | 0.87*      | 0.37    | -0.65    |
|                    | Peak (au)    | 0.03   | 0.28  | -0.71* | 0.67*     | 0.87*      | 0.24    | -0.62    |
|                    | VRI (au)     | -0.11  | 0.33  | -0.59  | 0.54      | 0.72*      | 0.48    | -0.67*   |
|                    | VFI (au)     | 0.01   | 0.40  | -0.54  | 0.39      | 0.62       | 0.35    | -0.62    |
|                    | TtR (ms)     | -0.03  | 0.12  | 0.47   | -0.46     | -0.38      | 0.15    | 0.02     |
|                    | TtF (ms)     | 0.16   | 0.25  | 0.07   | -0.23     | -0.01      | 0.05    | -0.16    |
|                    | Skew         | 0.66*  | 0.02  | -0.32  | -0.03     | 0.19       | -0.69*  | 0.37     |
|                    | ATI          | -0.32  | -0.33 | 0.15   | 0.05      | -0.22      | 0.16    | 0.26     |
|                    | BOT          | -0.66* | -0.21 | 0.27   | -0.03     | -0.16      | 0.73*   | -0.39    |
| Fovea              | Dip (au)     | -0.11  | 0.42  | -0.41  | 0.50      | 0.26       | 0.59    | -0.34    |
|                    | Mean (au)    | 0.07   | 0.38  | -0.48  | 0.45      | 0.37       | 0.35    | -0.27    |
|                    | Peak (au)    | 0.18   | 0.33  | -0.44  | 0.38      | 0.41       | 0.18    | -0.22    |
|                    | VRI (au)     | 0.00   | 0.38  | -0.27  | 0.34      | 0.29       | 0.43    | -0.36    |
|                    | VFI (au)     | 0.08   | 0.43  | -0.24  | 0.21      | 0.24       | 0.30    | -0.28    |
|                    | TtR (ms)     | -0.10  | 0.00  | 0.35   | -0.24     | 0.00       | 0.31    | -0.38    |
|                    | TtF (ms)     | 0.18   | 0.10  | 0.15   | -0.35     | -0.01      | -0.10   | -0.14    |
|                    | Skew         | 0.49   | 0.06  | -0.21  | -0.08     | 0.20       | -0.79*  | 0.44     |
|                    | ATI          | -0.36  | -0.14 | -0.14  | 0.42      | 0.11       | 0.45    | -0.13    |
|                    | BOT          | -0.50  | -0.05 | 0.09   | 0.17      | -0.16      | 0.87*   | -0.39    |

**Supplemental Table 2C: Comparison between ocular blood flow metrics and traditional metrics used in glaucoma management among glaucoma subjects.** Pearson correlation coefficients (R) between BFVi measurements at dip, cycle mean, and peak in specific regions of the eye and conventional risk factors and indicators of glaucoma – age, intraocular pressure (IOP) in mmHg, cup to disc ratio (CDR), OCT metrics: minimum rim width (MRW) and retinal nerve fiber layer (RNFL), and visual field metrics: mean deviation (MD) and pattern standard deviation (PSD). Asterisks (\*) indicate significant correlations (p<0.05).

VRI: volumetric rise index, VFI: volumetric fall index, TtR: time-to-rise, TtF: time-to-fall, ATI: acceleration time index, BOT: blow-out time, a.u: arbitrary units, ms: milliseconds
